# Supplementary material for: Balancing selection at the human salivary agglutinin gene (DMBT1) driven by host-microbe interactions
Source: PubMed Central journal article supplement (PMC9038570; doi:10.1016/j.isci.2022.104189), 2022-04-01
Supplement: mmc1.pdf [file mmc1.pdf]

iScience, Volume 25

**Supplemental information**

**Balancing selection at the human  
salivary agglutinin gene (*DMBT1*)  
driven by host-microbe interactions**

**Adel F. Alharbi, Nongfei Sheng, Katie Nicol, Nicklas Strömberg, and Edward J. Hollox**

## Supplementary figures

### Supplementary Figure 1 Haplotype network of the *DMBT1* 16kb region in the French population, Related to STAR Methods

Haplotype median joining network of GRCh38 chr10:122555466-122571966 showing balancing selection and high Tajima's D values. The line indicates the boundary between haplotypes carrying C and A at rs11523871 and A, h indicates observed haplotypes, with size of circle representing number of observations in the sample, MV indicates internal nodes with no observed representative haplotype.

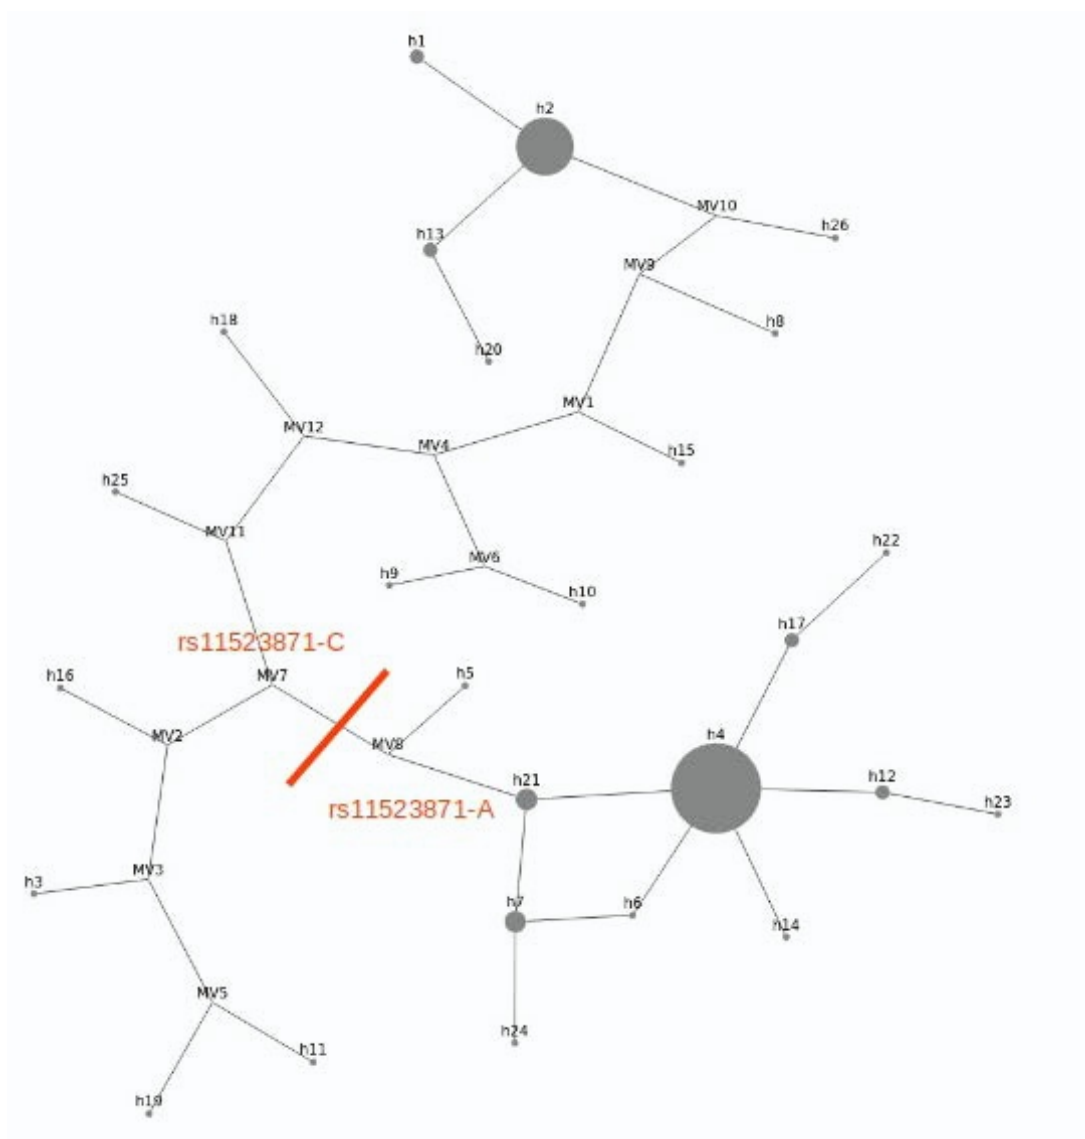

**Supplementary Figure 2 Binding of *S. mutans* phenotypes and recombinant rCnm to DMBT1 and co-receptors in saliva, Related to Figure 5.**

Saliva proteins blotted to a membrane after separation of parotid saliva were overlaid with wildtype (spaP A+, cnm+), single (spaP A- or cnm-) and double (spaP A-, cnm-) knock-out mutants and rCnm. The wildtype strain and Cnm+, spaP- mutant and rCnm protein showed equal binding to DMBT1, while the spaP A+, Cnm- and spaP A-, cnm- mutants showed reduced but residual activity. Both strains, mutants and rCnm bound to mono- and dimer amylase but strains/mutants and not rCnm to the acidic PRP protein bands, suggesting a plausible unspecific binding to the major saliva amylase components but potentially specific features of the acidic PRP co-receptors. The amylase and PRP components are marked by arrows.

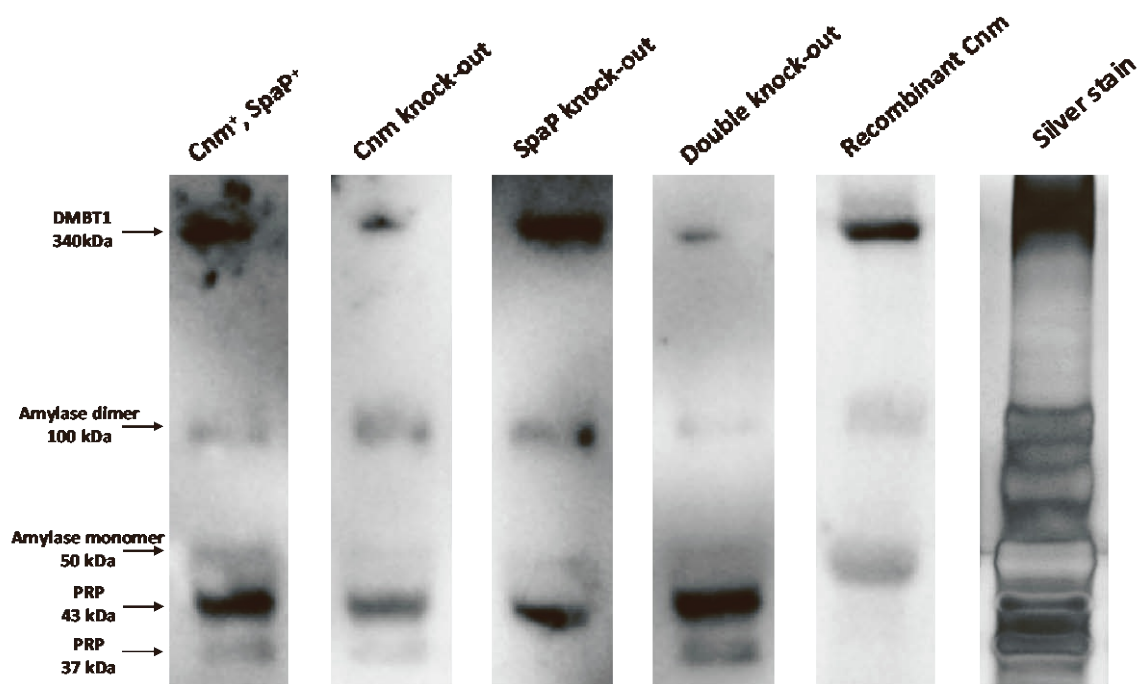

## Supplementary table

**Supplementary Table 1 - Normalised values for *DMBT1* Tajima's D in HGDP populations GRCh38 chr10:122555466-122571966, related to STAR Methods**

| Population    | z_value_TajimaD |
|---------------|-----------------|
| Adygei        | 2.76            |
| Balochi       | 1.49            |
| Bantu_NE      | 3.22            |
| Bantu_S       | 3.75            |
| Bedouin       | 3.27            |
| Biaka         | 3.44            |
| Brahui        | 2.00            |
| Burushi       | 1.08            |
| Cambodian     | 2.36            |
| Dai           | 0.64            |
| Daur          | -0.27           |
| Druze         | 1.73            |
| French        | 3.36            |
| French_Basque | 3.63            |
| Han           | 1.19            |
| Hazara        | 0.75            |
| Hezhen        | -1.25           |
| Japanese      | 0.95            |
| Kalash        | -0.01           |
| Lahu          | -0.07           |
| Makrani       | 2.15            |
| Mandenka      | 4.02            |
| Maya          | -1.41           |
| Mbuti         | 1.90            |
| Miaoazu       | 2.13            |
| Mongola       | -0.32           |
| Mozabite      | 4.21            |

|                |       |
|----------------|-------|
| NAN_Melanesian | -0.94 |
| Naxi           | -0.50 |
| North_Italian  | 0.55  |
| Orcadian       | 2.33  |
| Oroqen         | -1.15 |
| Palestinian    | 3.11  |
| Papuan         | -1.78 |
| Pathan         | 2.16  |
| Pima           | -1.95 |
| Russian        | 2.77  |
| San            | 1.60  |
| Sardinian      | 3.41  |
| She            | 2.45  |
| Sindhi         | 0.96  |
| Tu             | 1.00  |
| Tujia          | 2.28  |
| Tuscan         | 1.90  |
| Uygur          | 1.77  |
| Xibo           | -0.41 |
| Yakut          | 0.51  |
| Yizu           | 0.94  |
| Yoruba         | 4.29  |
